1 **An ecological perspective on microbial genes of unknown function in soil**

2

3

4 Hannah Holland-Moritz\*<sup>1</sup>, Chiara Vanni<sup>2</sup>, Antonio Fernandez-Guerra<sup>3</sup>, Andrew Bissett<sup>4</sup>, and Noah  
5 Fierer<sup>5</sup>

6

7 <sup>1</sup>Department of Natural Resources and the Environment, University of New Hampshire, Durham, NH,  
8 USA

9 <sup>2</sup>Microbial Genomics and Bioinformatics Research Group, Max Planck Institute for Marine  
10 Microbiology, Celsiusstraße 1, 28359, Bremen, Germany

11 Jacobs University Bremen, Campus Ring 1, 28759 Bremen, Germany

12 <sup>3</sup>Lundbeck GeoGenetics Centre, The Globe Institute, University of Copenhagen, Copenhagen,  
13 Denmark

14 <sup>4</sup>CSIRO, Oceans and Atmosphere, Hobart, Tasmania, Australia

15 <sup>5</sup>Department of Ecology and Evolutionary Biology, Cooperative Inst. for Research in Environmental  
16 Sciences, University of Colorado, Boulder, USA

17

18

19 **Competing Interests Statement**

20 The authors declare no competing financial interests.

21

22

23

## 24 **Abstract**

25 Genes that remain hypothetical, uncharacterized, and unannotated comprise a substantial  
26 portion of metagenomic datasets and are likely to be particularly prevalent in soils where poorly  
27 characterized taxa predominate. Documenting the prevalence, distribution, and potential roles of these  
28 genes of unknown function is an important first step to understanding their functional contributions in  
29 soil communities. We identified genes of unknown function from 50 soil metagenomes and analyzed  
30 their environmental distributions and ecological associations. We found that genes of unknown function  
31 are prevalent in soils, particularly fine-textured, higher pH soils that harbor greater abundances of  
32 *Crenarchaeota*, *Gemmatimonadota*, *Nitrospirota*, and *Methylomirabilota*. We identified 43 dominant  
33 (abundant and ubiquitous) gene clusters of unknown function and determined their associations with  
34 soil microbial phyla and other “known” genes. We found that these dominant unknown genes were  
35 commonly associated with microbial phyla that are relatively uncharacterized, with the majority of  
36 these dominant unknown genes associated with mobile genetic elements. This work demonstrates a  
37 strategy for investigating genes of unknown function in soils, emphasizes the biological insights that  
38 can be learned by adopting this strategy, and highlights specific hypotheses that warrant further  
39 investigation regarding the functional roles of abundant and ubiquitous genes of unknown function in  
40 soil metagenomes.

41

## 42 **Introduction**

43 Soils are one of the largest reservoirs of genetic diversity on Earth (1,2). One gram of soil can  
44 harbor hundreds to thousands of distinct microbial taxa (3,4) and an estimated 1 000 Gbp of microbial  
45 genome sequences (5). Soil microbial communities are essential contributors to terrestrial nutrient  
46 cycling and carbon dynamics, with wide-ranging effects on plant and animal health (6). Unfortunately,  
47 soil microbial taxa are underrepresented in culture and genomic sequence databases (6,7). The adoption  
48 of high-throughput sequencing technologies has yielded new insights into the full-extent of soil

49 microbial diversity and provide glimpses into the genomes, transcriptomes, and functional attributes of  
50 organisms that are as-yet uncharacterized. While these molecular approaches bring clear benefits to  
51 understanding soil microbial communities, they also pose a fundamental challenge as a large fraction of  
52 genomic data is composed of genes of unknown function.

53 Genes of unknown function are abundant in many habitats (40-60% of genes in a given  
54 environment (8–11)). While this issue is not unique to soils, several aspects of soil microbiology  
55 indicate that soil microbial communities harbor large proportions of genes of unknown function. First,  
56 soils are one of the most phylogenetically diverse microbial habitats (12,13) and the genetic diversity  
57 found within soils is equally impressive (2,14,15). Second, the majority of soil microbes are difficult to  
58 isolate and study in the laboratory (16). There are many reasons for this, including the observation that  
59 many soil microbes are likely slow-growing oligotrophs that can be difficult to culture using standard  
60 approaches (17). Thus, soil environments often harbor a higher proportion of uncultivated taxa (18,19)  
61 as compared to environments (like human skin and gut) where a larger fraction of the microbial  
62 communities are represented in culture-based collections (16). Third, many physical and biological  
63 aspects of soil, such as micro-site heterogeneity and high strain-level variation, make it a particularly  
64 challenging environment to apply assembly-based metagenomic techniques (6,20). Despite these  
65 limitations, the genes of unknown function found in soil may hold important ecological information  
66 (9,21). From work with marine and human microbiomes (11), we know that these genes are enriched in  
67 phyla with more genomes represented only in metagenome-assembled genomes (MAGs), have more  
68 restricted distributions than known genes (i.e., less likely to be shared across distinct samples), and are  
69 more common in marine environments than in host-associated environments. Metagenomic studies of  
70 soil microbial communities typically focus only on “known” genes, i.e. genes that can be functionally  
71 annotated with a reasonably high degree of confidence (with some notable exceptions, e.g. (19)),  
72 effectively discarding the unannotated genes from downstream analyses and ignoring the insight that

73 these genes may provide about microbial life in soil. While these unannotated genes are often  
74 acknowledged (2,11,12), they are typically not the explicit focus of study.

75 We set out to understand the genes of unknown function in 50 soil samples from a publicly  
76 available dataset compiled by the Australian Microbiome Initiative (22). Specifically, we used a new  
77 tool, AGNOSTOS (11), to identify gene clusters and group them into four categories: “Known with  
78 Pfam Annotation”, “Known without Pfam Annotation”, “Genomic Unknowns” (found in cultured and  
79 sequenced isolates and in MAGs of sufficient quality to be included in genome databases), and  
80 “Environmental Unknowns” (found in metagenomes) – see Table 1. Using these data, we asked the  
81 following questions: 1) How abundant are genes of unknown function? 2) Are there particular soil  
82 conditions, or soils containing particular microbial taxa, that are more likely to harbor higher  
83 abundances of these genes? 3) Which genes of unknown function are particularly abundant and  
84 ubiquitous across soils? Broadly, we hypothesized that genes of unknown function would be  
85 widespread in soils and the proportion of these genes found in metagenomes would vary along  
86 ecological gradients, with higher proportions in soils where environmental conditions limit the  
87 abundances of more copiotrophic taxa (19). We further hypothesized that the genes of unknown  
88 function would be enriched in soil that contained higher abundances of under-studied microbial  
89 lineages (i.e. lineages with few cultivated representatives). Finally, we compiled a “hit list” of abundant  
90 and ubiquitous (“dominant”) genes of unknown function in soils and used their associations with  
91 microbial taxa and genes of known function to infer their potential ecological characteristics and direct  
92 future research efforts to further explore the novel genetic diversity found in soil microbial  
93 communities.

94

## 95 **Methods**

### 96 *Sample selection*

97 We used publicly available soil metagenomic data from the Australian Microbiome Initiative  
98 Biomes of Australian Soil Environments (BASE) project (22). The project includes 449 soil samples  
99 for which shotgun metagenomic data are available. From this subset of samples that had metagenomic  
100 data, we selected a random sub-sample of 48 surface soil samples and viewed them on a map to make  
101 sure that they represented a good spatial sampling of regions across Australia (Figure S1A). The goal of  
102 this random sub-sampling was to reduce the number of samples to a computationally manageable size  
103 and to select a set of samples that represented a wide range of environmental gradients across Australia.  
104 The sample identifiers are listed in Table S1 and raw sequencing data are available at the Australian  
105 Microbiome Initiative Data Portal ([https://data.bioplatforms.com/organization/about/australian-](https://data.bioplatforms.com/organization/about/australian-microbiome)  
106 [microbiome](https://data.bioplatforms.com/organization/about/australian-microbiome)) as well as on the NCBI Sequence Read Archive (BioProject accession number  
107 PRJNA317932).

108

#### 109 *Sampling protocol, DNA extraction, and sequencing*

110 The Australian Microbiome Initiative uses a standard set of protocols for all samples. Full  
111 details are available at <https://www.australianmicrobiome.com/protocols/>. Specific protocols used for  
112 the samples and data included in this study are found under protocol headings labeled (“as per BASE”).  
113 To summarize, between 9-30 soil samples were taken from the top 10 cm of a 25×25 m plot with the  
114 plot location selected to represent a visually homogeneous soil environment. Soil samples from the plot  
115 were then homogenized to generate one representative surface sample per plot with the composited  
116 sample frozen immediately after collection.

117 DNA was extracted from triplicate 250 mg sub-samples of each soil using the DNeasy  
118 PowerLyzer PowerSoil Kit (Qiagen), following the Earth Microbiome protocol (23), and pooled prior  
119 to downstream processing. Metagenomic sequencing libraries were prepared following the Illumina  
120 TruSeqNano DNA Sample Preparation Guide. Briefly, 200 ng of DNA from each sample was sheared  
121 to 550bp using Covaris sonic shearing. Clean-up of the sheared DNA, ligation of the adapters, and PCR

122 amplification of the DNA followed the TruSeq Nano DNA Sample Preparation Guide. The resulting  
123 libraries were sequenced on an Illumina HiSeq with 2x150bp sequencing chemistry. The median  
124 number of reads per sample was 30.2 million reads, with a range from 11.8 million reads to 154.9  
125 million reads (Table S1).

126

### 127 *Environmental data*

128 To better understand the relationships between genes of unknown function and environmental  
129 gradients, we selected ten soil and site factors that are often important in structuring soil microbial  
130 communities (6). The factors included four site-specific variables: mean annual temperature, mean  
131 annual precipitation, aridity (as inferred from calculation of the aridity index, (24)), and net  
132 aboveground primary productivity (NPP). We also included six soil-specific variables: soil pH, percent  
133 organic carbon, extractable inorganic nitrogen, phosphorus, conductivity, and texture (% silt + % clay)  
134 (Figure S1B). We calculated Pearson correlations between each of these environmental variables. Most  
135 were weakly to moderately correlated in our samples, except site aridity index and mean annual  
136 precipitation, which were understandably well-correlated as precipitation is used to calculate the aridity  
137 index (Figure S1B). As is evident from Figure S1C, the 48 samples span broad gradients in soil and site  
138 characteristics (Figure S1C).

139 Analyses of soil chemical and physical properties were conducted by a commercial laboratory  
140 (CSBP Laboratories, Bibra Lake, Western Australia) using standard methods. Briefly, percent organic  
141 carbon was measured according to the Walkley-Black method using concentrated sulfuric acid and  
142 dichromate in a colorimetric test. For extractable inorganic nitrogen, we summed extractable nitrate and  
143 ammonium together. Both nitrate and ammonium were extracted with 2M KCl and measured  
144 colorimetrically. Available phosphorous was calculated using the Colwell method (25). We also  
145 summarized the texture of each soil into a single metric by summing the silt and clay percentages.

146 For each soil, we also compiled data on climate and plant productivity (i.e., mean annual  
147 temperature, mean annual precipitation, aridity index, and NPP) at the collection site from the Atlas of  
148 Living Australia spatial portal (26). From this data portal, we selected the mean annual precipitation,  
149 aridity index, and NPP standard environmental data products produced by the ecosystem sciences  
150 division of Australia's Commonwealth Scientific and Industrial Research Organisation (CSIRO), and  
151 the mean annual temperature product from the WorldClim database (27).

152

### 153 *Generation of metagenomic assemblies and taxonomic composition table*

154 We downloaded the raw sequence data from the Bioplatforms Australia Data Portal  
155 (<https://data.bioplatforms.com/>). After downloading, we removed adapters and other library-preparation  
156 contaminant sequences from the FASTQ files using Cutadapt (28) and filtered out sequences with low  
157 average quality scores and short sequence length with Sickle (29) (-q 20 -l 50). We verified the read  
158 quality of our filtered data with FastQC (<http://www.bioinformatics.babraham.ac.uk/projects/fastqc/>)  
159 and MultiQC (30) before proceeding. To assemble the reads, we tried three different assemblers (IDBA  
160 – settings: default (31), metaSPAdes – settings: default (32), and MEGAHIT – settings: “meta-large”  
161 preset (33)) and ultimately used MEGAHIT as it represented a good balance between assembly quality  
162 and computational burden. To minimize downstream computational costs, we filtered out small contigs  
163 <1000 bp, since these were unlikely to contain whole genes. We assessed assembly quality with  
164 QUAST (default settings) (34), and used Bowtie2 (default settings) (35) to map the filtered reads back  
165 to the filtered assemblies.

166 As is common for soils, assembly rates were fairly low with an average assembly length of 123  
167 Mbp (ranging from 7 – 954 Mbp), and a mean N50 of 0.79 Kbp (ranging from 0.6 – 1.3 Kbp) before  
168 filtering. We note that, although the assemblies are fragmented, our analyses focused on dominant and  
169 abundant gene clusters (see below), which are less likely to be affected by the low assembly rates.

170 Assembly, rather than read-based analysis, is required for downstream analysis with AGNOSTOS (see  
171 below). Full assembly statistics and mapping rates can be found in Table S1.

172 We also determined the taxonomic composition of the microbial communities in each sample.  
173 We used phyloFlash (36) in “almost everything” mode to identify and assign taxonomy to fragments of  
174 the small-subunit (16S/18S) rRNA gene in each metagenome. Using the number of hits to fragments  
175 identified in each sample, we created a taxon-by-sample table for downstream analyses. After creating  
176 the table, we filtered the table to exclude taxa identified as Chloroplast, Mitochondria, or Eukaryotes,  
177 with these categories typically representing <7.2% of recovered small-subunit rRNA gene reads. We  
178 also removed any taxa that were unassigned at the phylum level (<3.5% of small-subunit rRNA gene  
179 reads). After filtering the table, we controlled for differences in sequencing depth by rarefying the table.  
180 We picked 1720 rRNA gene hits at random from each sample, which was the number of hits in the  
181 sample with the lowest number of hits. Finally, we converted our taxon-by-sample table into  
182 proportional abundances for downstream analyses.

183

#### 184 *Identifying genes of unknown function*

185 To identify genes of unknown function in our samples we used AGNOSTOS (11). AGNOSTOS  
186 is a tool for partitioning coding sequence space into known and unknown clusters of genes. It clusters  
187 genes based on sequence homology and classifies each gene cluster into one of four categories, *Known*  
188 *with Pfam Annotation*, *Known without Pfam Annotation*, *Genomic Unknown*, and *Environmental*  
189 *Unknown* (Table 1). To integrate soil metagenomes with the original AGNOSTOS database  
190 (seedDB+NCLDV), we used the “DB-update” module of AGNOSTOS described in (37) which  
191 integrates new sequences into the original gene cluster database. We note that the AGNOSTOS  
192 database is dominated by prokaryotic (bacterial and archaeal) genes, as genes from eukaryotes  
193 (including fungi) and viruses represent only a small fraction of the total database (37). Briefly,  
194 AGNOSTOS uses Prodigal (38) to identify open reading frames in assembled contigs and filters out



195 spurious open reading frames that overlap with true protein-coding open reading frames (commonly  
196 called “shadow genes” (38) and those that are found in the Antifam database of spurious open reading  
197 frames (40). Importantly for metagenomic analysis, partial and incomplete genes are retained.  
198 AGNOSTOS then annotates these genes against Pfam (41) using hmmsearch from HMMER (42). After  
199 the Pfam annotation, genes are clustered with MMseqs2 (43) to create a homology-based database that  
200 is independent of a gene cluster’s known or unknown status. AGNOSTOS then screens the gene  
201 clusters for quality, ensuring that each cluster is made up of sufficiently homologous genes, and  
202 discarding those clusters composed of insufficiently similar genes and those composed of a high  
203 number of spurious genes. At this stage, clusters containing singletons are identified, but were not  
204 further categorized as there is insufficient information in a singleton cluster for reliable categorization  
205 into one of the four categories (Table 1). Although singleton clusters lack sufficient information to  
206 rigorously categorize, it is likely that the majority of these clusters represent genes of unknown  
207 function that are rarer in databases and in our samples. We note that Vanni and others (37) found that,  
208 as new data is added to the AGNOSTOS database, many of the singleton gene clusters acquire more  
209 representation and can be identified and characterized, suggesting that the majority of these sequences  
210 are not sequencing artifacts or assembly errors, but simply rarer genes. After clusters are cleaned and  
211 filtered (including removing singletons), a consensus sequence for each cluster is generated and  
212 clusters are each assigned to one of the four categories (Table 1). Gene clusters with at least one  
213 member assigned to a Pfam domain of known function are classified as “known with Pfam”. Gene  
214 clusters with a consensus sequence that matched sequences in the NCBI *nr* database (44), UniRef90  
215 database (45) or the Uniclust database (46), are categorized as either “known without Pfam annotation”  
216 or “genomic unknowns” depending on their similarity to characterized proteins or to proteins annotated  
217 with terms typical of genes of unknown function (e.g. “hypothetical”, “uncharacterized”, etc.) or  
218 another name used to classify unknown proteins in the databases’ controlled vocabulary. Gene clusters  
219 with Pfam annotations to domains of unknown function (“DUF”) are then also added in the “genomic

220 unknown” category. Finally, any gene clusters whose consensus sequences do not align with any of the  
221 databases are characterized as “environmental unknowns”.

222         After running AGNOSTOS, we identified ~3.7 million genes overall with an average of about  
223 63 000 genes per sample. Of the 3.7 million predicted genes, ~2.43 million (66%) were assigned to one  
224 of the 574 173 original AGNOSTOS database gene clusters. The remaining genes (~1.24 million) were  
225 clustered separately into 152 634 new gene clusters with more than one gene and 713 940 ‘clusters’  
226 singletons. The new gene clusters (which contained only soil genes) and singletons from the original  
227 database that recruited new genes when the soil samples were integrated, were processed through the  
228 AGNOSTOS validation, refinement, and classification steps. The new validated set of high-quality  
229 gene clusters was integrated with the original clusters to form a new database of ~598 000 gene clusters  
230 containing ~126 million genes (including ~2.61 million soil genes). We generated a gene-cluster-by-  
231 sample table of gene cluster abundances by using the average coverage depth of each cluster in each  
232 sample. As with the taxon-by-sample table (see above), we combined duplicate samples at this point.

233

### 234 *Statistical Analyses*

235         To determine the soil or site characteristics that correlated with the observed variation in the  
236 proportional abundances of gene clusters of unknown function in our samples we ran Pearson  
237 correlations between the percentage of gene clusters of unknown function in each sample (defined as  
238 the number of gene clusters assigned to “genomic unknown” and “environmental unknown” divided by  
239 the total number of non-discarded gene clusters), and each of the ten environmental variables we had  
240 selected for analysis. We used the same methodology to determine which taxonomic groups (phylum  
241 level) were correlated with the proportion of gene clusters of unknown function, after filtering out low-  
242 abundance phyla (relative abundance < 0.1 %) to reduce the chance of spurious correlations. For these  
243 correlations, we used the false discovery rate method (47) to correct the p-values for multiple tests.

244 We also identified “dominant” gene clusters of unknown function in soils. A gene cluster was  
245 considered dominant based on its abundance and ubiquity across samples, following Delgado-  
246 Baquerizo et al. (13). To identify gene clusters of unknown function that were abundant and ubiquitous  
247 in soils, we filtered the 550 000 gene clusters in our 48 samples to remove those that were found in  
248 fewer than five samples (< 10% of soil samples). This reduced the list of gene clusters to ~64 000  
249 clusters. Using the Bowtie2 mapping results, we first normalized the per-base coverage by the length of  
250 the gene and used this normalized coverage as a proxy for abundance. Then we calculated the median  
251 normalized coverage for each gene cluster across all samples. Gene clusters with a median normalized  
252 coverage across all samples >0 were considered abundant. After filtering for dominant gene clusters,  
253 we identified a total of 43 genomic unknowns and 2461 knowns. We recognize that deeper sequencing  
254 would likely have increased the number of dominant gene clusters identified here. However, our goal  
255 was not to identify all genes (whether “known” or “unknown”) in each soil, as that is arguably an  
256 impossible task given the complexity of soil metagenomes. Rather, our goal was to identify the more  
257 abundant and ubiquitous genes found across the set of 48 soils included here.

258 Because all of the dominant unknowns were classified as genomic unknowns, we wanted to  
259 understand which taxa correlated with abundances of these unknowns. To determine this, we ran  
260 Spearman correlations between the relative abundances of dominant unknown genes and the  
261 abundances of microbial phyla in our soil samples. We used false discovery rate to correct for multiple  
262 tests (47). To better understand the functions of the unknowns we ran correlations between each  
263 dominant cluster of known function and each dominant unknown cluster using SparCC (48) as  
264 implemented in the FastSpar software package (49). To minimize the chance of capturing spurious  
265 correlations, we used a p-value cutoff of 0.05, and selected only the strongest correlations (correlation  
266 > 0.5) for downstream analysis. Finally, we visualized the results of these gene cluster-to-gene cluster  
267 correlations in a co-occurrence network. The network was created in R, using packages R packages  
268 tidygraph (<https://tidygraph.data-imaginist.com/>), and ggraph (<https://ggraph.data-imaginist.com/>).

269

## 270 *GTDB-classification of dominant gene clusters*

271 To better understand the scope of genomic diversity represented by the dominant unknown gene  
272 clusters, we used the Genome Taxonomy Database (GTDB) (50) to assign taxonomy to the contigs  
273 containing at least one of each of the 43 dominant unknown gene clusters. We used MMSeqs2 (43) to  
274 query sequences against GTDB and assign taxonomy using the MMSeqs2 taxonomic assignment  
275 methodology. Briefly, MMSeqs2 uses a computationally efficient method to query each gene on a  
276 genome fragment against a reference database and assigns taxonomy to genome fragments containing  
277 those genes (i.e., the contigs assigned to one of the 43 dominant unknown genes clusters) based on the  
278 2bLCA taxonomy assignment protocol (51). The 2bLCA method filters hits to a database for quality  
279 based on an e-score cut-off ( $e < 1 \times 10^{-12}$ ) and finds the lowest common ancestor of all hits that pass  
280 filter. We used GTDB (version 95) as our taxonomy reference database and the following parameters:  
281 “--tax-lineage 2 --majority 0.5 --vote-mode 1 --lca-mode 3 --orf-filter 1 --lca-ranks  
282 superkingdom,phylum,class,order,family,genus” to run MMSeqs2. From these results, we were able to  
283 calculate the number of genomes in GTDB with at least one dominant unknown gene cluster and the  
284 most likely taxonomic assignment of each contig based on the taxonomy associated with those  
285 genomes in GTDB.

286

## 287 **Results and Discussion**

### 288 *Abundance of genes of unknown function in soils*

289 We identified ~550 000 gene clusters (and ~607 000 singleton clusters for a total of ~1.16  
290 million clusters) that met the established criteria across the 48 soil samples and calculated the  
291 proportion of genes in each sample assigned to each of the four categories (Table 1). On average across  
292 the samples, 73.6% of gene clusters were known with Pfam, 10.2% were known without Pfam, 15.8%  
293 were genomic unknowns, and 0.4% were environmental unknowns (Figure 1A). The proportion of

294 unknowns varied from 11.9% to 21.7% (Figure 1A). Although not included in downstream analyses as  
295 they could not be categorized into the four categories (Table 1), we note that singletons represented a  
296 large proportion of identified genes in soils, with nearly twice as many singletons as unknowns (Figure  
297 S2A). Singletons also varied from around 13% to 30% of gene clusters per sample, confirming that a  
298 large fraction of the genes in soil metagenomics are likely of unknown function (Figure S2A).  
299 Importantly, the majority of unknown gene clusters were classified as “genomic unknowns”, suggesting  
300 that most unknown gene clusters in these soils represent “low hanging fruit”, that is genes that are  
301 unknown (unannotated, hypothetical, or otherwise uncharacterized), but found in genomic databases of  
302 sequenced organisms, and therefore more easily characterized than environmental unknowns (i.e., those  
303 found exclusively in metagenomes or metagenome-assembled genomes) (11).

304         While the soil metagenomes were found to have a high proportion of genomic unknowns  
305 (approximately 12-20% of non-singleton gene clusters), we note that quantifying the specific  
306 proportion of genomic unknowns comes with important caveats. First, our ability to detect genes of  
307 unknown function in soils is limited by our ability to detect genes in assembled soil metagenomic data.  
308 Therefore, we are likely missing many genes from these soil metagenomes as a result of the well-  
309 recognized challenges posed by soil metagenomic analyses, and evidenced by the low number of  
310 sequences that mapped to our assembled contigs (Table S1) (14,52). The large proportion of singletons  
311 we identified in the samples supports this explanation, as they likely represent rarer, genomic and  
312 environmental unknowns that are insufficiently captured in our assemblies. These computational  
313 challenges limit our ability to detect genes of unknown function that are less abundant or exhibit  
314 attributes such as highly variable regions, that make assembly challenging (52–54). Second, the  
315 methods we used to classify genes as having a known function yield estimates that are fundamentally  
316 conservative. Although a gene may be identified as known, this does not mean that we know much  
317 about its function across the wide breadth of microbial diversity (9). As evolution is inherently an  
318 iterative process, many proteins from within the same family may exhibit different functions in

319 different organisms and ecological contexts. For example, ammonia monooxygenase and methane  
320 monooxygenase genes are assigned to the same Pfam family (AMO), but are functionally distinct (55).  
321 Likewise, the similarities between *nifH* genes (involved in nitrogen fixation) and *frxC* genes (involved  
322 in light-independent chlorophyll biosynthesis) place them in the same Pfam family (Fer4\_NifH),  
323 despite coding for distinct proteins (56). Therefore, our estimate of the proportion of genes of unknown  
324 function in soil metagenomes is likely an underestimate.

325         Despite these caveats, we next sought to understand how the proportion of genes of unknown  
326 function in soils compared to other metagenomic datasets that were also processed with AGNOSTOS.  
327 We compared the total percentages of gene clusters in each category in two additional environments:  
328 marine waters and the human microbiome (see refs. (57–61) for assembly statistics). We compared the  
329 total number of gene clusters in each category identified in our soil samples to the total number of gene  
330 clusters in each category identified in the four marine and two human microbiome metagenomic  
331 surveys used in Vanni et al. (11) (Figure 1B). We found that the percentages of gene clusters in each  
332 category were consistent across the human microbiome, marine, and soil environments in three of the  
333 four gene-cluster categories. On average, 66-74% of the gene clusters in each environment were known  
334 with a Pfam designation, 10-13% were known without a Pfam designation, and 16-22% were genomic  
335 unknowns. The proportion of environmental unknowns in soils was lower than in marine and human-  
336 associated environments, with 0.93% and 1.6% of gene clusters assigned to this category in human and  
337 marine environments, respectively, and only 0.32% of soil gene clusters found as environmental  
338 unknowns. However, given the diversity of soil metagenomes and the aforementioned challenges  
339 associated with assembling genes from soil metagenomes (52,53), this comparatively small proportion  
340 of environmental unknowns is likely to be a product of under-sampling the less-abundant genes in soil  
341 metagenomes. In support of this explanation, we note the high proportion of singletons in soils (Figure  
342 S2B) which are likely composed of a majority of real genes that are rare rather than sequencing  
343 artifacts or assembly errors (37).

344           With the exception of environmental unknowns, the proportions of each gene cluster category  
345 were similar across environments. This observation runs counter to our hypothesis that soils would  
346 have a higher proportion of unknown genes than other environments. Although it is likely that we are  
347 missing many environmental unknowns due to insufficient sequencing and fragmented assemblies, the  
348 consistency of our results across environments is supported by their similarity to proportions of each  
349 gene category found by Vanni et al. (11) within the GTDB which contains genomes and high quality  
350 MAGs from a wide variety of environments. These general similarities in the proportions of genes  
351 across environments and genomes suggest that the proportions of unknown and known genes is fairly  
352 consistent even across distinct habitat types.

353           Interestingly, although the proportions of unknown genes in soils were similar to those in  
354 marine and human microbiome surveys, this result was not necessarily a product of the same gene  
355 clusters being found across all three environments. Of the gene clusters found in the soil samples, ~  
356 377 000 (68%) of the clusters were not found in either the human or the marine data sets. Those soil-  
357 specific gene clusters were slightly enriched in genomic unknowns (29 %) and environmental  
358 unknowns (1.1%) when compared to the set of gene clusters that included human and marine clusters  
359 (22.8 % and 0.01 %). These results suggest that although proportions of unknown genes are similar  
360 across environments, the soil-specific gene clusters may represent a source of unknown genetic  
361 potential that is distinct from that found in either marine or human-associated environments.

362

### 363 *Environmental and microbial groups and genes of unknown functions*

364           Although the majority of gene clusters from assembled contigs in our samples were known, the  
365 proportion of unknown non-singleton gene clusters in each soil sample varied from 12-20%. To better  
366 understand which environmental factors explained variation in the percentage of unknown genes in our  
367 samples, we ran correlations between ten environmental factors (Figure S1C) and the proportion of  
368 gene clusters of unknown function in our samples. Of the ten environmental factors, only soil pH (cor =

369 0.42,  $p = 0.003$ ) and texture ( $\text{cor} = 0.49$ ,  $p = 0.001$ ) were significantly correlated with the proportion of  
370 gene clusters of unknown function (Figure S3). Importantly, these results were unlikely to be a product  
371 of differences in sequencing depth across our samples as the proportion of unknown genes in our  
372 samples was not strongly correlated with either sequencing depth (Pearson correlation = 0.26,  $p =$   
373 0.08), or with the total number of genes per sample (Pearson correlation = 0.32,  $p = 0.03$ ).

374 Unknown gene clusters were enriched in high-pH soils and finer-textured soils. It is notable that  
375 of the ten environmental factors tested, only pH and texture were found to be significant. The most  
376 likely explanation for this pattern is that higher pH and finer-textured soils are more likely to harbor a  
377 greater fraction of microbes with high proportions of genes of unknown function. This explanation is  
378 supported by the analysis of correlations between individual microbial phyla and the proportion of  
379 unknown genes in the metagenomes (Figure S4). We identified five phyla that were significantly  
380 positively correlated with the percentage of unknowns, and four phyla that were negatively correlated  
381 with unknowns. *Crenarchaeota*, *Gemmatimonadota*, *Nitrospirota*, *Entotheonellaeota*, and  
382 *Methyloirabilota* were all positively correlated with the proportion of unknown genes.  
383 *Bdellovibrionota*, WPS-2 (Eremiobacterota), *Proteobacteria*, and *Patescibacteria* were all negatively  
384 correlated with the percentage of unknowns (Figure S4). Many of the positively correlated phyla are  
385 also positively correlated with pH or texture in our dataset (*Gemmatimonadota*: pH – rho = 0.66,  
386 *Crenarchaeota*: pH – rho = 0.60, *Methyloirabilota*: texture – rho = 0.47, *Nitrospirota*: pH – rho =  
387 0.47, *Entotheonellaeota*: pH – rho = 0.46,  $p < 0.05$ , Spearman correlations) and some of the negatively  
388 correlated phyla are negatively correlated with soil pH (WPS-2/Eremiobacterota: pH – rho = -0.55,  
389 *Proteobacteria*: pH – rho = -0.50,  $p < 0.05$ , Spearman correlations). While correlations do not imply  
390 causal relationships, the most parsimonious explanation for these results is that higher pH and finer  
391 textured soils are more likely to harbor certain phyla that have higher proportions of genes of unknown  
392 function and serve as ripe targets for explorations of novel genetic diversity.



394 *A “hit list” of ubiquitous and abundant genes of unknown function in soils*

395 To identify the dominant gene clusters found in our samples, we filtered our data to select only  
396 the most abundant and ubiquitous gene clusters in soil samples (see Methods). Applying these criteria  
397 yielded 43 gene clusters of unknown function, all of which fell into the genomic unknown category,  
398 and 2461 gene clusters of known function (Figure 2). For simplicity, we hereafter refer to the 43  
399 abundant and ubiquitous gene clusters as “dominant” unknown gene clusters.

400 To better understand the genomic and ecological context of the dominant unknown gene  
401 clusters, we ran correlations between the clusters and phyla in our samples (Figure 3). Positive  
402 correlations between the dominant gene clusters and taxa ranged from 0.41-0.77. While some of the  
403 gene clusters were positively correlated with many taxa (e.g., GC34767203 correlated with 8 phyla),  
404 others were only significantly correlated with one or two phyla (e.g., GC17275105). The phyla that had  
405 the largest numbers of positive correlations to the dominant unknown gene clusters included the  
406 Unclassified Phylum RCP2-54, *Verrucomicrobiota*, *Proteobacteria*, *Acidobacteriota*, and  
407 *Planctomycetota* (Figure 3). Many of the phyla that were positively correlated with dominant unknown  
408 gene clusters were lineages that are typically found in high abundances in soils (13). While many of  
409 these lineages, such *Acidobacteria* or *Verrucomicrobia*, contain large numbers of uncultivated taxa (62)  
410 some of these phyla come from lineages that have been reasonably well-studied (e.g. *Proteobacteria*).  
411 While positive correlations do not necessarily imply the presence of these genes in genomes from  
412 members of these phyla, these well-studied taxa potentially represent a straightforward and simple  
413 route to discovering the functions of these gene clusters as many of the members of these phyla are  
414 reasonably well-represented in culture collections and genomic databases. By searching for these  
415 dominant unknowns in genome databases, and cross-referencing the results with strains that are  
416 available in culture collections, it may be feasible characterize the functions of dominant unknown  
417 genes in soils using targeted experiments, as demonstrated by Price et al. (9).

418 To further understand the genomic context of the dominant unknown gene clusters, we searched  
419 for the contigs associated with our 43 dominant unknown gene clusters in the GTDB (50) and used a  
420 consensus taxonomy assignment approach to assign taxonomy to each contig. Our goal was to try to  
421 identify which taxa might harbor these dominant unknown genes by searching for these genes in a  
422 curated genome database, versus simply assessing correlations between taxa and cluster abundances  
423 directly from shotgun data (Figure 3). The median number of genomes with matches to each dominant  
424 unknown gene cluster was 175, ranging from 38 (GC36965309) to 796 (GC38645763) genomes per  
425 dominant cluster and, in general, clusters that were unique to our soil data set (i.e., not found in either  
426 the marine or human microbiome datasets) had fewer hits to genomes in the database (Figure 4).  
427 Confirming the correlation-based results described above and in Figure 3, the most well-represented  
428 phyla across the dominant unknown gene clusters were those that are typically abundant in soils (e.g.,  
429 *Proteobacteria*, *Acidobacteria*, and *Actinobacteria*) (Figure 4). However, there are some important  
430 discrepancies between the taxonomic results from the GTDB-database and the correlation results  
431 (Figure 3). Many of the less well-studied lineages that were correlated with the abundances of  
432 particular phyla in our soil dataset (Figure 3) are rare or absent from the GTDB analysis (e.g.,  
433 Unclassified Phylum RCP2-54 and *Verrucomicrobia*). This is likely due to the fact that some of these  
434 lineages are not well represented in GTDB. For example, there are no sequenced genomes or MAGs for  
435 RCP2-52 and, even other phyla for which far more genomes are available in GTDB, genomes from  
436 representative soil lineages may not be well-represented in GTDB. For example, the phylum  
437 *Actinobacteria*, one of the best-represented lineages in GTDB and one of the most abundant phyla in  
438 soils globally (13) has 24 602 entries in GTDB, but only 427 (1.7%) are representatives isolated from  
439 soil. Thus, we expect that some of these dominant unknown genes in soil may be associated with  
440 lineages that are reasonably common in soil, but under-represented in GTDB and comparable genomic  
441 databases. Alternatively, the observed discrepancies may be the result of spurious correlations with the  
442 correlation-based analyses (Figure 3). However, the overall consistency between the two results

443 suggests that the majority of these relationships are likely robust, and that a paired approach using  
444 multiple methods of taxonomic assignment can be a productive method to generate hypotheses about  
445 the taxa associated with genes of unknown function.

446 In addition to determining the potential taxonomic affiliation of the dominant genes of unknown  
447 function, we also sought to determine their potential functions. We did so by assessing relationships  
448 between known (annotated) gene clusters and the dominant “unknown” gene clusters across the 48  
449 metagenomes, following the working assumption that annotated and unknown genes which are  
450 correlated may have related functions (63,64). In total, 16 of the 43 gene clusters had at least one  
451 positive correlation with known gene clusters above the established threshold. All 16 of these genomic  
452 unknowns were correlated with mobile genetic elements such as transposases, reverse transcriptases, or  
453 phage integrases (Table 2). These mobile genetic element-associated genes made up the majority of  
454 “known” genes correlated with each of the 16 dominant genes of unknown function with (Table 2).  
455 These patterns are evident from a co-occurrence network visualization of the associations between  
456 genes of known function and those of unknown function (Figure 5, see Figure S5 for a version of this  
457 network with labeled known gene clusters). Importantly, many of the gene clusters associated with  
458 mobile genetic elements were also positively correlated with more bacterial and archaeal phyla (Figure  
459 3), and their positive correlations with mobile genetic elements may suggest a mechanism as to why  
460 they are so taxonomically widespread.

461 Mobile genetic elements represent one of the main categories of unexplored genetic diversity  
462 (65) and are thought to be one of the most abundant functional gene categories across the tree of life  
463 (66). Mobile elements are associated with elevated genomic plasticity and accelerated biological  
464 diversification (66). While traditionally associated with antibiotic resistance genes, one study of  
465 integrons across a broad diversity of metagenomes ranging from oceans, to guts, to soils, found that  
466 many are likely to be toxin/anti-toxin genes, but that most integron genes are of unknown function (65).  
467 Their results are consistent with the findings from this study, which suggest that many of the most

468 dominant genes of unknown function in soils are correlated with the abundances of transposases,  
469 recombinases, resolvases, phage integrases, and other mobile genetic elements. Clearly further  
470 investigations into the ecology, function and genomic contexts of mobile genetic elements are  
471 warranted, considering that many of the dominant unknown genes we identified from soil tend to co-  
472 occur with genes coding for mobile genetic elements.

473

## 474 **Conclusions**

475 We have demonstrated that genes of unknown function comprise a substantial portion of the  
476 genes in soils and we are likely underestimating their true abundances due to challenges associated  
477 with adequately capturing the full extent of soil metagenomic diversity. Most notably, genes of  
478 unknown function were more abundant in some soils than others and this variance was, in part,  
479 predictable from soil edaphic properties and the taxonomic composition of the soil microbial  
480 communities. Finally, we were able to identify the most dominant genes of unknown function in soil,  
481 defined as those genes that are abundant and ubiquitous across a wide range of soil types. We find that  
482 these dominant genes of unknown function are primarily found in typically abundant soil lineages that  
483 are less-well studied such as *Verrucomicrobia* and *Acidobacteria*, with the majority of these dominant  
484 genes associated with mobile genetic elements. Our work demonstrates the utility of investigating  
485 genes of unknown function and represents a first step towards “ecological annotation” of the dominant  
486 genes of unknown function in soils to elucidate what taxa are likely to have these genes, what  
487 environments they are most likely to be found in, and the putative functions of the unknown genes that  
488 represent an important fraction of soil metagenomes.

489

## 490 **Acknowledgments**

491 We would like to thank Christopher Miller and Sarah Bagby for helpful comments on the manuscript  
492 and methods. We would like to acknowledge the contribution of the Biomes of Australian Soil

493 Environments (BASE) consortium in the generation of data used in this publication. The BASE project  
494 was supported by funding from Bioplatforms Australia through the Australian Government National  
495 Collaborative Research Infrastructure Strategy (NCRIS). We would also like to acknowledge the use of  
496 the Atlas of Living Australia, spatial data [grid.506668.b](#) We also acknowledge the computer resources  
497 at MareNostrum and the technical support provided by Barcelona Supercomputing Center (RES-  
498 AECT-2014-2-0085), the BMBF-funded de.NBI Cloud within the German Network for Bioinformatics  
499 Infrastructure (de.NBI) (031A537B, 031A533A, 031A538A, 031A533B, 031A535A, 031A537C,  
500 031A534A, 031A532B), the University of Oxford Advanced Research Computing  
501 (<http://dx.doi.org/10.5281/zenodo.22558>). CV was supported by the Max Planck Society.

502

### 503 **Competing Interests Statement**

504 The authors declare no competing financial interests.

505 **Bibliography**

506

1. Alteio LV, Schulz F, Seshadri R, Varghese N, Rodriguez-Reillo W, Ryan E, et al. Complementary Metagenomic Approaches Improve Reconstruction of Microbial Diversity in a Forest Soil. *mSystems*. 2020;5(2):1–18.
2. Bahram M, Hildebrand F, Forslund SK, Anderson JL, Soudzilovskaia NA, Bodegom PM, et al. Structure and function of the global topsoil microbiome. *Nature*. 2018;560(7717):233–7.
3. Prosser JI. Dispersing misconceptions and identifying opportunities for the use of “omics” in soil microbial ecology. *Nature Reviews Microbiology*. 2015;13(7):439–46.
4. Schloss PD, Girard RA, Martin T, Edwards J, Thrash JC. Status of the Archaeal and Bacterial Census: an Update. Delong EF, McFall-Ngai MJ, editors. *mBio* [Internet]. 2016;7(3). Available from: <https://mbio.asm.org/content/7/3/e00201-16>
5. Vogel TM, Simonet P, Jansson JK, Hirsch PR, Tiedje JM, van Elsas JD, et al. TerraGenome: a consortium for the sequencing of a soil metagenome. *Nature Reviews Microbiology*. 2009;7(4):252.
6. Fierer N. Embracing the unknown: disentangling the complexities of the soil microbiome. *Nature Reviews Microbiology*. 2017;15(10):579–90.
7. Choi J, Yang F, Stepanauskas R, Cardenas E, Garoutte A, Williams R, et al. Strategies to improve reference databases for soil microbiomes. *The ISME Journal*. 2017;11(4):829–34.
8. Bernard G, Pathmanathan JS, Lannes R, Lopez P, Bapteste E. Microbial dark matter investigations: How microbial studies transform biological knowledge and empirically sketch a logic of scientific discovery. *Genome Biology and Evolution*. 2018;10(3):707–15.
9. Price MN, Wetmore KM, Waters RJ, Callaghan M, Ray J, Liu H, et al. Mutant phenotypes for thousands of bacterial genes of unknown function. *Nature*. 2018;557(7706):503–9.
10. Chen LX, Anantharaman K, Shaiber A, Murat Eren A, Banfield JF. Accurate and complete genomes from metagenomes. *Genome Research*. 2020;30(3):315–33.
11. Vanni C, Schechter MS, Acinas SG, Barberán A, Buttigieg PL, Casamayor EO, et al. Light into the darkness: Unifying the known and unknown coding sequence space in microbiome analyses. *bioRxiv* [Internet]. 2020; Available from: <https://www.biorxiv.org/content/early/2020/08/11/2020.06.30.180448>
12. Thompson LR, Sanders JG, McDonald D, Amir A, Ladau J, Locey KJ, et al. A communal catalogue reveals Earth’s multiscale microbial diversity. *Nature*. 2017;551(7681):457–63.
13. Delgado-Baquerizo M, Oliverio AM, Brewer TE, Benavent-González A, Eldridge DJ, Bardgett RD, et al. A global atlas of the dominant bacteria found in soil. *Science*. 2018;359(6373):320–5.
14. Howe AC, Jansson JK, Malfatti SA, Tringe SG, Tiedje JM, Brown CT. Tackling soil diversity with the assembly of large, complex metagenomes. *Proceedings of the National Academy of Sciences of the United States of America*. 2014;111(13):4904–9.

15. Jansson JK, Hofmockel KS. The soil microbiome—from metagenomics to metaphenomics. *Current opinion in microbiology*. 2018;43:162–8.
16. Lloyd KG, Steen AD, Ladau J, Yin J, Crosby L. Phylogenetically Novel Uncultured Microbial Cells Dominate Earth Microbiomes. Neufeld JD, editor. *mSystems* [Internet]. 2018;3(5). Available from: <https://msystems.asm.org/content/3/5/e00055-18>
17. Carini P. A “Cultural” Renaissance: Genomics Breathes New Life into an Old Craft. *mSystems* [Internet]. 2019;4(3). Available from: <https://msystems.asm.org/content/4/3/e00092-19>
18. Brewer TE, Aronson EL, Arogyaswamy K, Billings SA, Botthoff JK, Campbell AN, et al. Ecological and Genomic Attributes of Novel Bacterial Taxa That Thrive in Subsurface Soil Horizons. Martiny J, editor. *mBio* [Internet]. 2019;10(5). Available from: <https://mbio.asm.org/content/10/5/e01318-19>
19. Chen Y, Neilson JW, Kushwaha P, Maier RM, Barberán A. Life-history strategies of soil microbial communities in an arid ecosystem. *ISME Journal* [Internet]. 2020; Available from: <http://dx.doi.org/10.1038/s41396-020-00803-y>
20. Lombard N, Prestat E, van Elsas JD, Simonet P. Soil-specific limitations for access and analysis of soil microbial communities by metagenomics. *FEMS Microbiology Ecology*. 2011;78(1):31–49.
21. Berini F, Casciello C, Marcone GL, Marinelli F. Metagenomics: Novel enzymes from non-culturable microbes. *FEMS Microbiology Letters*. 2017;364(21):1–19.
22. Bissett A, Fitzgerald A, Meintjes T, Mele PM, Reith F, Dennis PG, et al. Introducing BASE: the Biomes of Australian Soil Environments soil microbial diversity database. *GigaScience*. 2016;5(1):21.
23. Marotz C, Amir A, Humphrey G, Gaffney J, Gogul G, Knight R. DNA extraction for streamlined metagenomics of diverse environmental samples. *BioTechniques*. 2017;62(6):290–3.
24. Middleton Nick, Thomas D. *World atlas of desertification* /. 2nd ed. London ; Arnold ;; 1997.
25. Colwell J. An automatic procedure for the determination of phosphorus in sodium hydrogen carbonate extracts of soils. *Chemical Industry*. 1965;22:893–5.
26. Belbin L. The Atlas of Living Australia’s spatial portal. In: *Proceedings of the environmental information management conference*. 2011. p. 28–9.
27. Fick SE, Hijmans RJ. WorldClim 2: new 1-km spatial resolution climate surfaces for global land areas. *International Journal of Climatology*. 2017;37(12):4302–15.
28. Martin M. Cutadapt removes adapter sequences from high-throughput sequencing reads. *EMBnet.journal*. 2011;17(1):10–2.
29. Joshi NA, Fass JN. Sickle: A sliding-window, adaptive, quality-based trimming tool for FastQ files (Version 1.33) [Software]. 2011.



30. Ewels P, Magnusson M, Lundin S, Källér M. MultiQC: summarize analysis results for multiple tools and samples in a single report. *Bioinformatics*. 2016;32(19):3047–8.
31. Peng Y, Leung HCM, Yiu SM, Chin FYL. IDBA-UD: A de novo assembler for single-cell and metagenomic sequencing data with highly uneven depth. *Bioinformatics*. 2012;28(11):1420–8.
32. Nurk S, Meleshko D, Korobeynikov A, Pevzner PA. metaSPAdes: a new versatile metagenomic assembler. *Genome research*. 2017/03/15 ed. 2017 May;27(5):824–34.
33. Li D, Liu CM, Luo R, Sadakane K, Lam TW. MEGAHIT: An ultra-fast single-node solution for large and complex metagenomics assembly via succinct de Bruijn graph. *Bioinformatics*. 2014;31(10):1674–6.
34. Gurevich A, Saveliev V, Vyahhi N, Tesler G. QUAST: quality assessment tool for genome assemblies. *Bioinformatics*. 2013;29(8):1072–5.
35. Langmead B, Salzberg SL. Fast gapped-read alignment with Bowtie 2. *Nature methods*. 2013;9(4):357–9.
36. Gruber-Vodicka HR, Seah BKB, Pruesse E. phyloFlash: Rapid Small-Subunit rRNA Profiling and Targeted Assembly from Metagenomes. Arumugam M, Kato S, editors. *mSystems* [Internet]. 2020;5(5). Available from: <https://msystems.asm.org/content/5/5/e00920-20>
37. Vanni C, Schechter MS, Delmont TO, Eren AM, Steinegger M, Glöckner FO, et al. AGNOSTOS-DB: a resource to unlock the uncharted regions of the coding sequence space. *bioRxiv* [Internet]. 2021; Available from: <https://www.biorxiv.org/content/early/2021/06/07/2021.06.07.447314>
38. Hyatt D, Chen GL, LoCascio PF, Land ML, Larimer FW, Hauser LJ. Prodigal: Prokaryotic gene recognition and translation initiation site identification. *BMC Bioinformatics*. 2010;11.
39. Yooseph S, Li W, Sutton G. Gene identification and protein classification in microbial metagenomic sequence data via incremental clustering. *BMC Bioinformatics*. 2008;9(1):182.
40. Eberhardt RY, Haft DH, Punta M, Martin M, O’Donovan C, Bateman A. AntiFam: a tool to help identify spurious ORFs in protein annotation. *Database* [Internet]. 2012;2012. Available from: <https://doi.org/10.1093/database/bas003>
41. El-Gebali S, Mistry J, Bateman A, Eddy SR, Luciani A, Potter SC, et al. The Pfam protein families database in 2019. *Nucleic acids research*. 2019 Jan;47(D1):D427–32.
42. Finn RD, Clements J, Eddy SR. HMMER web server: interactive sequence similarity searching. *Nucleic Acids Research*. 2011;39(suppl\_2):W29–37.
43. Steinegger M, Söding J. MMseqs2 enables sensitive protein sequence searching for the analysis of massive data sets. *Nature Biotechnology*. 2017;35(11):1026–8.
44. NCBI Resource Coordinators. Database resources of the National Center for Biotechnology Information. *Nucleic Acids Research*. 2017;46(D1):D8–13.
45. The UniProt Consortium. UniProt: the universal protein knowledgebase. *Nucleic Acids Research*. 2016;45(D1):D158–69.



46. Mirdita M, von den Driesch L, Galiez C, Martin MJ, Söding J, Steinegger M. Uniclust databases of clustered and deeply annotated protein sequences and alignments. *Nucleic Acids Research*. 2016;45(D1):D170–6.
47. Benjamini Y, Hochberg Y. Controlling the False Discovery Rate: A Practical and Powerful Approach to Multiple Testing. *Journal of the Royal Statistical Society Series B (Methodological)*. 1995;57(1):289–300.
48. Friedman J, Alm EJ. Inferring Correlation Networks from Genomic Survey Data. *PLOS Computational Biology*. 2012;8(9):1–11.
49. Watts SC, Ritchie SC, Inouye M, Holt KE. FastSpar: rapid and scalable correlation estimation for compositional data. *Bioinformatics*. 2018;35(6):1064–6.
50. Parks DH, Chuvochina M, Chaumeil P-A, Rinke C, Mussig AJ, Hugenholtz P. A complete domain-to-species taxonomy for Bacteria and Archaea. *Nature Biotechnology*. 2020;38(9):1079–86.
51. Hingamp P, Grimsley N, Acinas SG, Clerissi C, Subirana L, Poulain J, et al. Exploring nucleocytoplasmic large DNA viruses in Tara Oceans microbial metagenomes. *The ISME Journal*. 2013;7(9):1678–95.
52. Vollmers J, Wiegand S, Kaster A-K. Comparing and Evaluating Metagenome Assembly Tools from a Microbiologist’s Perspective - Not Only Size Matters! *PLOS ONE*. 2017;12(1):1–31.
53. Quince C, Walker AW, Simpson JT, Loman NJ, Segata N. Shotgun metagenomics, from sampling to analysis. *Nature Biotechnology*. 2017;35(9):833–44.
54. Sczyrba A, Hofmann P, Belmann P, Koslicki D, Janssen S, Dröge J, et al. Critical Assessment of Metagenome Interpretation—a benchmark of metagenomics software. *Nature Methods*. 2017;14(11):1063–71.
55. Holmes AJ, Costello A, Lidstrom ME, Murrell JC. Evidence that particulate methane monooxygenase and ammonia monooxygenase may be evolutionarily related. *FEMS Microbiology Letters*. 1995;132(3):203–8.
56. Fujita Y, Takahashi Y, Chuganji M, Matsubara H. The nifH-Like (frxC) Gene Is Involved in the Biosynthesis of Chlorophyll in the Filamentous Cyanobacterium *Plectonema boryanum*. *Plant and cell physiology*. 1992 Jan;33(1):81–92.
57. Sunagawa S, Coelho LP, Chaffron S, Kultima JR, Labadie K, Salazar G, et al. Structure and function of the global ocean microbiome. *Science*. 2015;348(6237):1–10.
58. Kopf A, Bica M, Kottmann R, Schnetzer J, Kostadinov I, Lehmann K, et al. The ocean sampling day consortium. *Gigascience*. 2015;4(1):s13742-015.
59. Rusch DB, Halpern AL, Sutton G, Heidelberg KB, Williamson S, Yooseph S, et al. The Sorcerer II global ocean sampling expedition: northwest Atlantic through eastern tropical Pacific. *PLoS biology*. 2007;5(3):e77.

60. Duarte CM. Seafaring in the 21st century: the Malaspina 2010 circumnavigation expedition. *Limnology and Oceanography Bulletin*. 2015;24(1):11–4.
61. Lloyd-Price J, Mahurkar A, Rahnavard G, Crabtree J, Orvis J, Hall AB, et al. Strains, functions and dynamics in the expanded Human Microbiome Project. *Nature*. 2017;550(7674):61–6.
62. Solden L, Lloyd K, Wrighton K. The bright side of microbial dark matter: Lessons learned from the uncultivated majority. *Current Opinion in Microbiology*. 2016;31:217–26.
63. Yi G, Sze SH, Thon MR. Identifying clusters of functionally related genes in genomes. *Bioinformatics*. 2007;23(9):1053–60.
64. Rogozin IB, Makarova KS, Wolf YI, Koonin EV. Computational approaches for the analysis of gene neighbourhoods in prokaryotic genomes. *Briefings in bioinformatics*. 2004;5(2):131–49.
65. Buongiorno Pereira M, Österlund T, Eriksson KM, Backhaus T, Axelson-Fisk M, Kristiansson E. A comprehensive survey of integron-associated genes present in metagenomes. *BMC Genomics*. 2020;21(1):1–14.
66. Aziz RK, Breitbart M, Edwards RA. Transposases are the most abundant, most ubiquitous genes in nature. *Nucleic Acids Research*. 2010;38(13):4207–17.

**Tables and Figures for:**

**An ecological perspective on microbial genes of unknown function in soil**

508  
509  
510  
511  
512  
513  
514  
515  
516  
517  
518  
519  
520  
521  
522  
523  
524  
525

Hannah Holland-Moritz\*<sup>1</sup>, Chiara Vanni<sup>2</sup>, Antonio Fernandez-Guerra<sup>3</sup>, Andrew Bissett<sup>4</sup>, and Noah Fierer<sup>5</sup>

<sup>1</sup> Department of Natural Resources and the Environment, University of New Hampshire, Durham, NH, USA

<sup>2</sup> Microbial Genomics and Bioinformatics Research Group, Max Planck Institute for Marine Microbiology, Celsiusstraße 1, 28359, Bremen, Germany

Jacobs University Bremen, Campus Ring 1, 28759 Bremen, Germany

<sup>3</sup> Lundbeck GeoGenetics Centre, The Globe Institute, University of Copenhagen, Copenhagen, Denmark

<sup>4</sup> CSIRO, Oceans and Atmosphere, Hobart, Tasmania, Australia

<sup>5</sup> Department of Ecology and Evolutionary Biology, Cooperative Inst. for Research in Environmental Sciences, University of Colorado, Boulder, USA

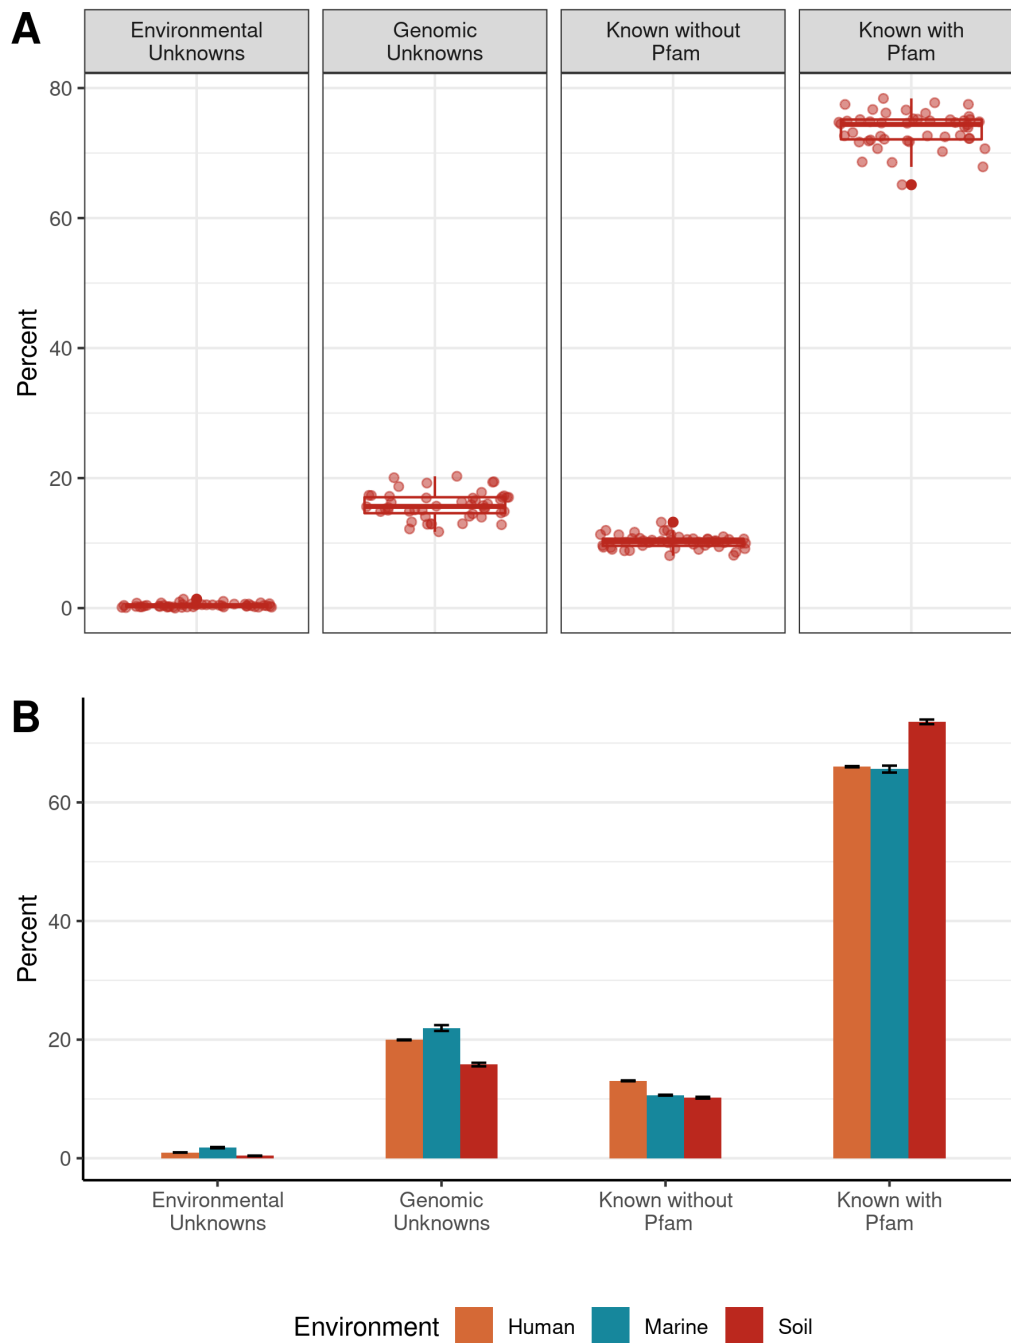

527 **Figure 1:** A) The percentage of each gene cluster category in our soil samples. B) A comparison  
528 between the percentages of each gene cluster category across metagenomes from three environments:  
529 soil, marine, and human-associated. Error bars represent mean standard error across samples.  
530

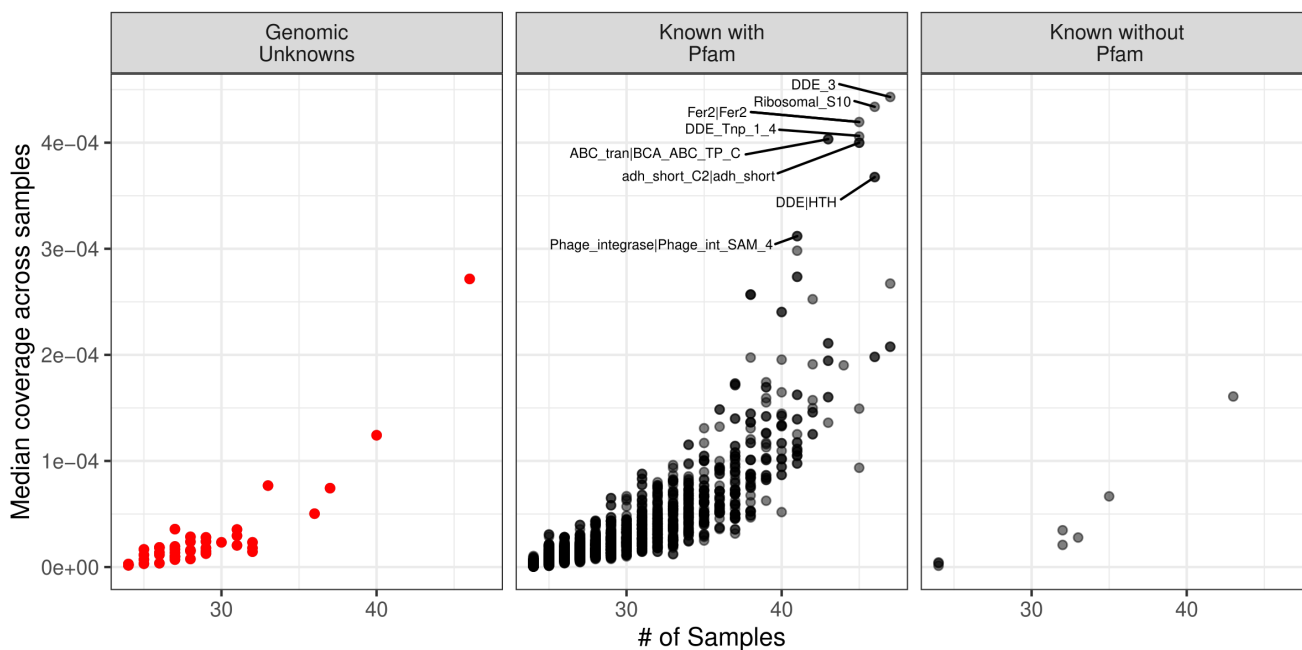

532 **Figure 2:** The “dominant” gene clusters in our samples. Each point represents one gene cluster. The x-  
533 axis shows the number of soil samples in which each gene cluster was found (“ubiquity”) and the y-  
534 axis shows the median coverage of each gene cluster across those samples (“abundance”). The most  
535 dominant clusters are in the top right corner of each plot, while less dominant clusters are in the bottom  
536 left corner of each plot. We identified 43 dominant unknowns in our samples (red) and 2461 knowns  
537 (black). Environmental unknowns are omitted from this figure, as no environmental unknowns were  
538 sufficiently abundant (mean coverage > 0) and ubiquitous (present in > 10% of samples) to be  
539 considered a “dominant” gene cluster. Pfam designations for some of the most abundant and ubiquitous  
540 known genes are indicated in the “Known with Pfam” panel.  
541

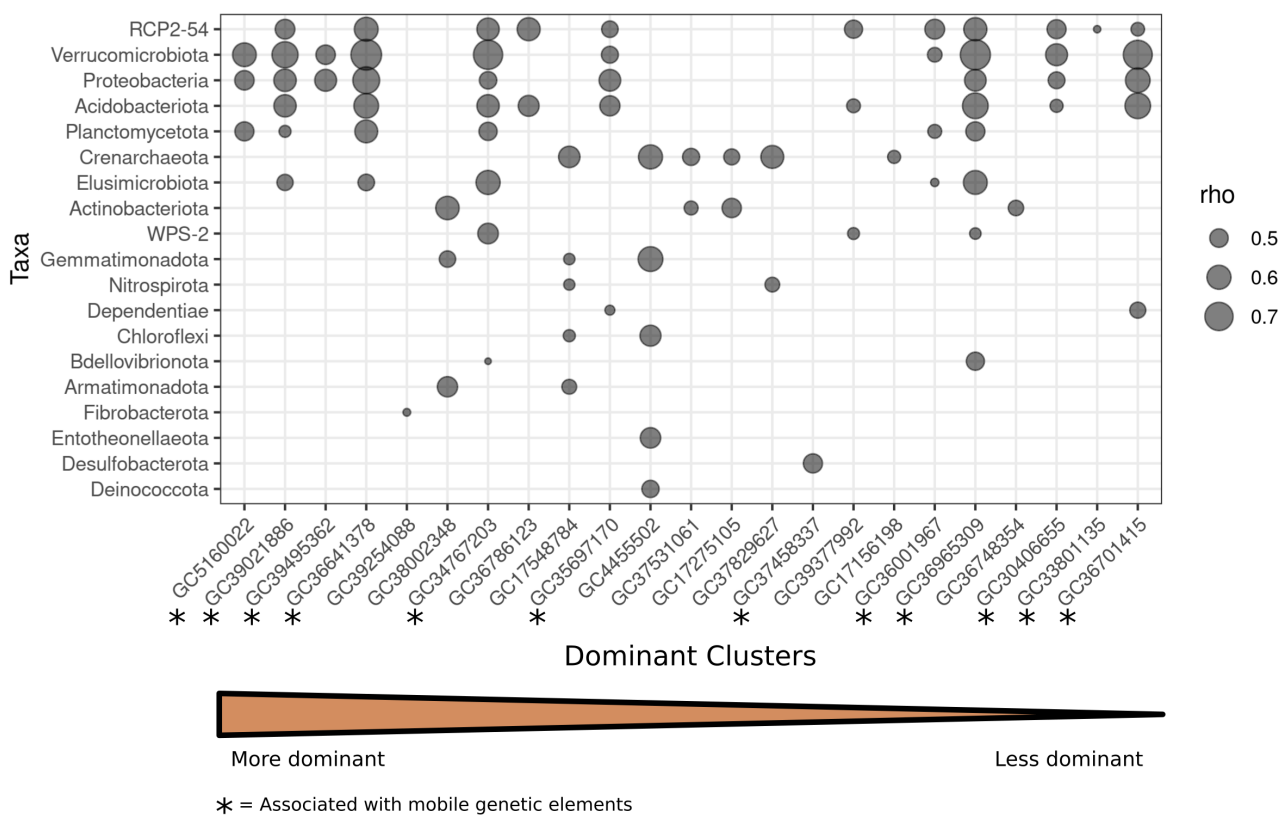

543 **Figure 3:** Positive correlations between dominant unknown gene clusters and specific bacterial and  
 544 archaeal phyla across the 48 soil samples included in this study. Each point represents a significant  
 545 Spearman correlation ( $p < 0.05$ ) between one of the 43 unknown clusters (x-axis) and a microbial  
 546 phylum (y-axis). Phyla are arranged in order of increasing number of significant correlations to  
 547 dominant clusters (bottom to top). Clusters are arranged in decreasing order of dominance (left to  
 548 right). The size of each point represents the strength of the rho value. Gene clusters that were also  
 549 found to be strongly associated with many mobile genetic elements (see Figure 5) are indicated with  
 550 asterisks.

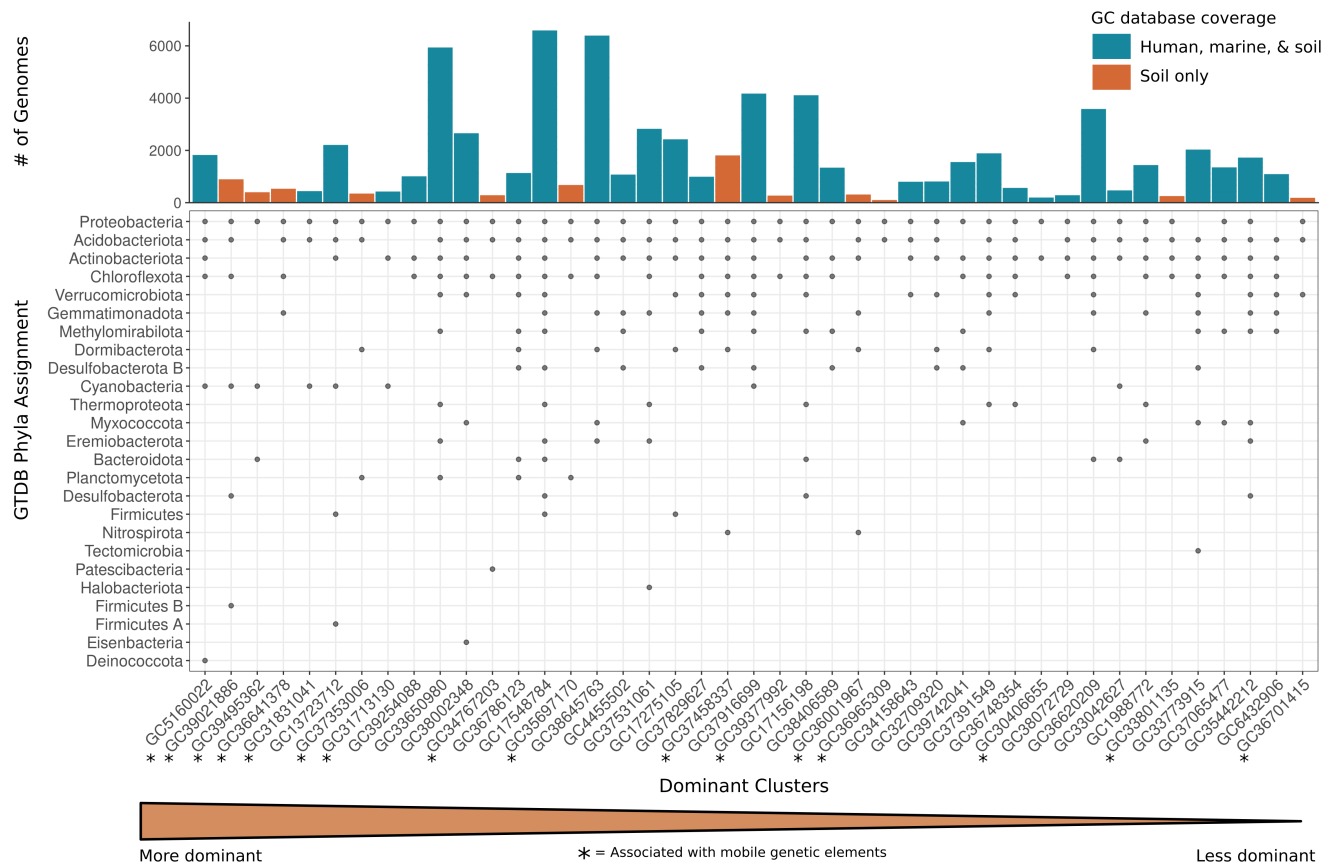

552 **Figure 4:** The taxonomic representation (phylum level) of contigs in dominant unknown gene clusters  
 553 mapped against the GTDB genome database. Contigs within each dominant unknown gene cluster were  
 554 assigned to a particular phylum based on best-hit consensus taxonomy assignments of the genes within  
 555 that contig using the 2blca method as implemented in mmseqs2. In the lower panel, a point indicates  
 556 the presence of at least one contig from the gene cluster (x-axis) being assigned to a particular phylum  
 557 (y-axis). In upper panel, bars indicate the number of genomes that contigs within a given gene cluster  
 558 mapped to (a hit to a genome was counted only for hits passing the filter threshold  $e\text{-score} < 1 \times 10^{-12}$ ).  
 559 The colors of the bars indicate whether or not a particular gene cluster was also found in marine or  
 560 human microbiome datasets (blue) or if the cluster was only found in soils (orange). Dominant clusters  
 561 that were also found to be strongly associated with many mobile genetic elements (see Figure 5) are  
 562 indicated with asterisks.  
 563

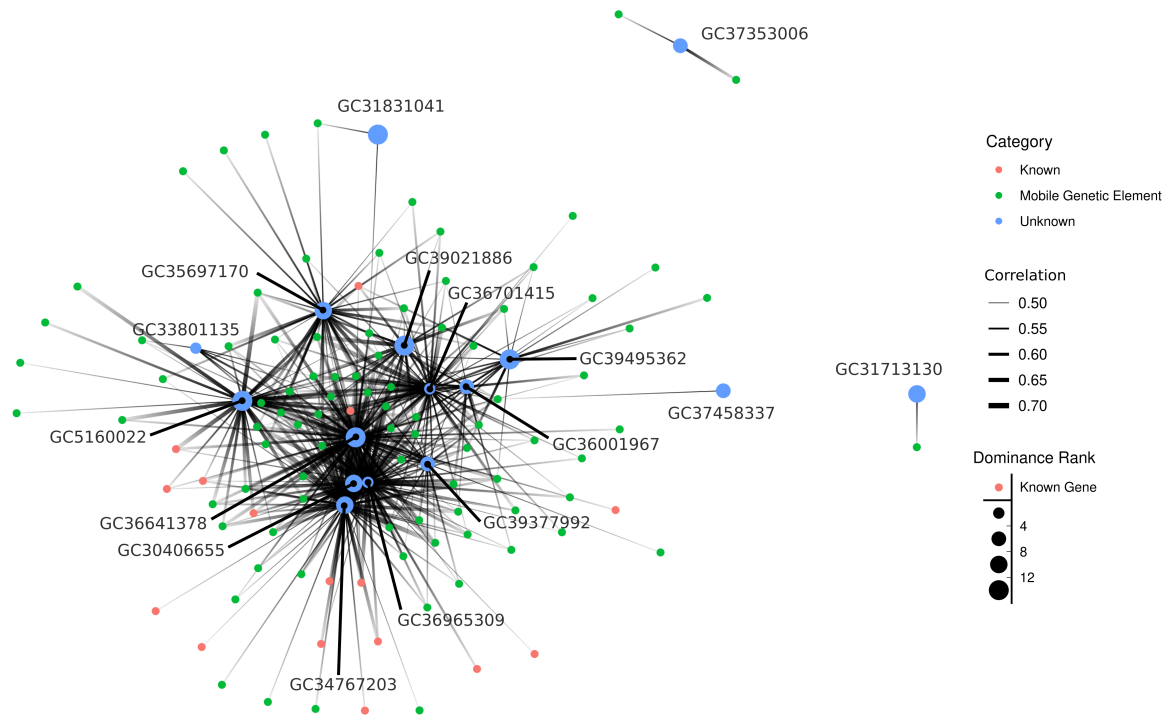

565 **Figure 5:** A co-occurrence network showing significant positive Spearman correlations ( $\rho > 0.6$ )  
566 between dominant unknown gene clusters and dominant known gene clusters. Unknown genes are  
567 indicated with the blue points, and the size of the points indicates how dominant they are relative  
568 to other dominant unknowns, with larger circles indicating a greater level of dominance. Known genes are  
569 displayed in green. Green points represent known genes that are mobile elements while all other known  
570 genes are displayed in red. The thickness of the edges represents the strength of the  $\rho$  value. A  
571 version of this figure with all points labeled with their Pfam designations can be found in the  
572 supplementary material (Figure S5).  
573



| Category                      | Description                                                                                                                                               |
|-------------------------------|-----------------------------------------------------------------------------------------------------------------------------------------------------------|
| <b>Knowns</b>                 |                                                                                                                                                           |
| Known with Pfam annotation    | Gene cluster contains at least one Pfam domain of known function                                                                                          |
| Known without Pfam annotation | Gene cluster contains genes that are without Pfam domain of known function, but are annotated with a function in the NCBI <i>nr</i> or UniRef90 databases |
| <b>Unknowns</b>               |                                                                                                                                                           |
| Genomic unknown               | Gene cluster contains at least one gene that is found in sequenced and draft genomes but are hypothetical, uncharacterized, or otherwise unannotated      |
| Environmental unknown         | Gene cluster contains genes that have no known sequence homology in sequenced or draft genomes and only found in metagenomes and MAGs                     |

575 **Table 1:** Description of each gene cluster category.
